# Supplementary material for: Food Environments and Their Influence on Food Choices: A Case Study in Informal Settlements in Nairobi, Kenya
Source: MDPI journal article supplement (doi:10.3390/nu14132571), 2022-06-21
Supplement: s1 [file s1]

## Supplementary Materials

Table S1. An overview of the types of vendors selling food in the informal settlements.

| Vendor type | Description                                                                                       | Photo examples                                                                      |
|-------------|---------------------------------------------------------------------------------------------------|-------------------------------------------------------------------------------------|
| Butcher     | Food stall selling primarily meat. Some butchers may also sell roasted meat or fresh produce/eggs |  |

## Kiosk

Food stalls selling ready-to-eat meals, fresh produce, fish, eggs, sweets & chocolate or grains and legumes. There is some permanent infrastructure. In some cases, there may also be seating (e.g., kiosks selling ready-to-eat foods and tea also known as kibandas)

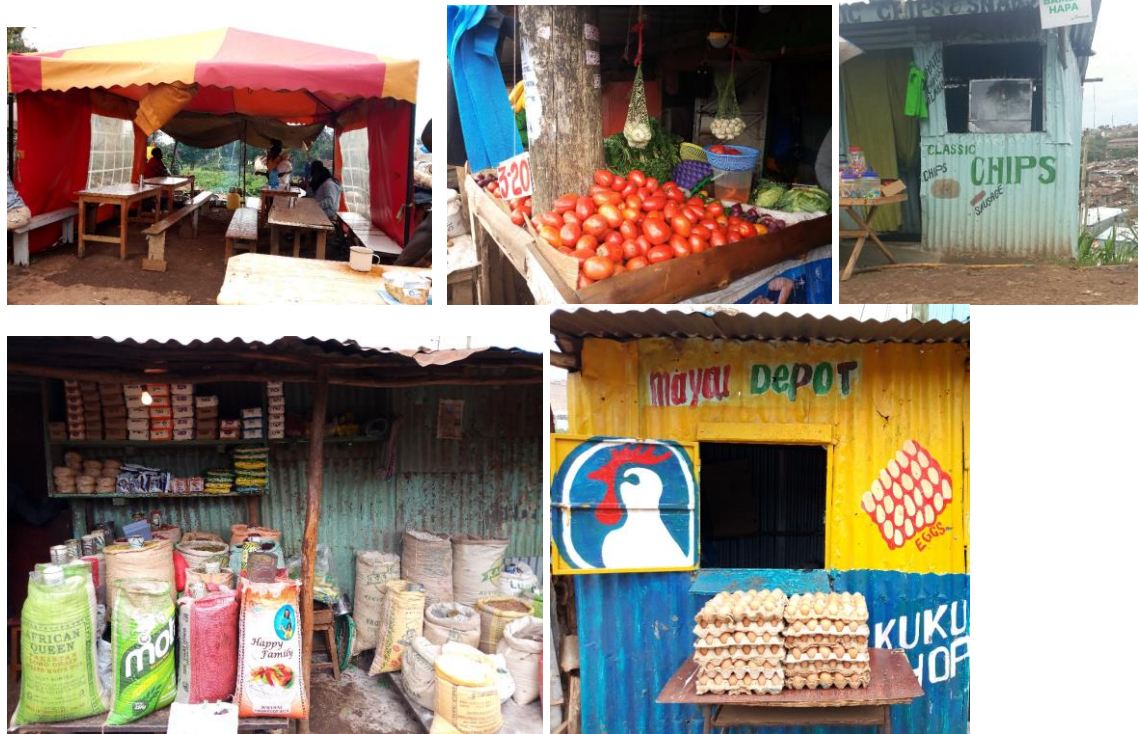

## Restaurants

Small independently owned restaurants selling meals, beverages and snacks. Typically referred to as hotels in the informal settlements.

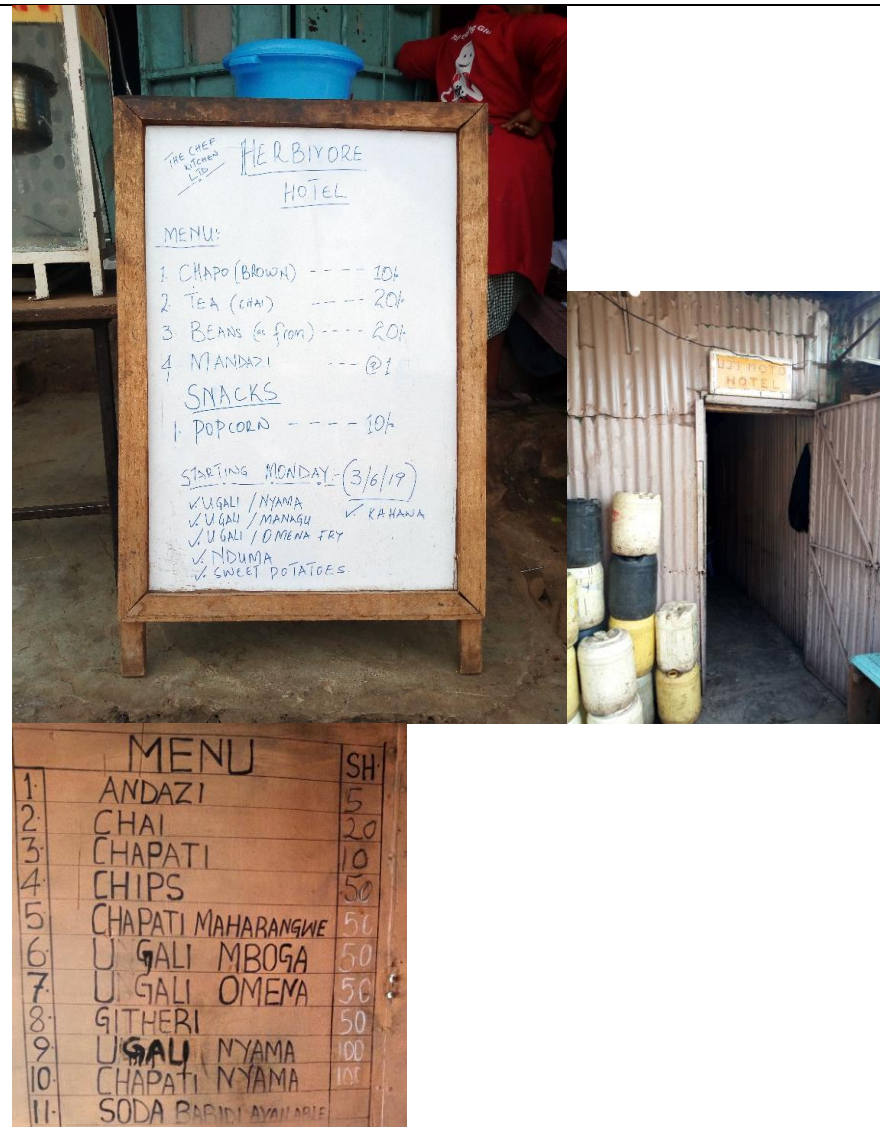

|              |                                                                                                                                                                                                                                                                                        |                                                                                     |  |
|--------------|----------------------------------------------------------------------------------------------------------------------------------------------------------------------------------------------------------------------------------------------------------------------------------------|-------------------------------------------------------------------------------------|--|
| Small grocer | <p>Mom and pop shop selling a variety of food and non-food items. They typically offer a variety of processed and ultra-processed foods. Some also sell fresh produce, eggs and/or milk. These are smaller than a supermarket but larger than a kiosk. Often referred to as Dukas.</p> |   |  |
| Wholesaler   | <p>Independently owned shops that sell packaged food and non-food items in relatively large quantities primarily to retailers rather than direct to consumers.</p>                                                                                                                     |  |  |



Milk vending machine

Milk dispensing or vending machine (referred to locally as milk ATMs) selling milk and in some cases other dairy products (e.g., ice cream)

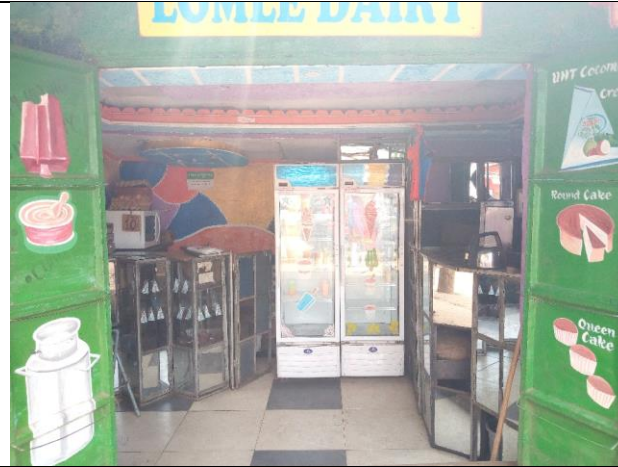

|                    |                                                                                                                                                                                                                                                         |                                                                                     |
|--------------------|---------------------------------------------------------------------------------------------------------------------------------------------------------------------------------------------------------------------------------------------------------|-------------------------------------------------------------------------------------|
| Street vendors     | <p>Small mobile or temporary roadside stands selling a variety of foods including fresh produce, fish, sweets and chocolate, ready-to-eat foods, etc. Typically there is limited infrastructure. Most vendors sell their foods at a fixed location.</p> |  |
| Small supermarket* | <p>Fixed structures selling a variety of processed, ultra-processed and fresh foods as well as non-food items. Larger than the small grocers but still relatively small in size. Supermarkets</p>                                                       |                                                                                     |

|  |                                                       |  |
|--|-------------------------------------------------------|--|
|  | in the informal settlements were independently owned. |  |
|--|-------------------------------------------------------|--|

\*Note: No photos of supermarkets were taken

Table S2. Inter-rater reliability of Pro-Desirability ratings of produce quality

| Location | Statistical test         | Overall desirability | Touch and firmness | Visual appeal     | Size              | Aroma             |
|----------|--------------------------|----------------------|--------------------|-------------------|-------------------|-------------------|
| Kibera   | Correlation coefficient  | 0.734                | 0.746              | 0.759             | 0.736             | 0.78              |
|          | P-value                  | <0.001               | <0.001             | <0.001            | <0.001            | <0.001            |
|          | Kibera (kappa $\pm$ SE ) | 0.244 $\pm$ 0.078    | 0.423 $\pm$ 0.055  | 0.336 $\pm$ 0.051 | 0.434 $\pm$ 0.051 | 0.437 $\pm$ 0.054 |
|          | P-value                  | <0.001               | <0.001             | <0.001            | <0.001            | <0.001            |
| Mukuru   | Correlation coefficient  | 0.664                | 0.562              | 0.493             | 0.597             | 0.634             |
|          | P-value                  | <0.001               | <0.001             | <0.001            | <0.001            | <0.001            |
|          | Mukuru (kappa $\pm$ SE ) | 0.418 $\pm$ 0.051    | 0.291 $\pm$ 0.052  | 0.248 $\pm$ 0.051 | 0.319 $\pm$ 0.051 | 0.328 $\pm$ 0.051 |
|          | P-value                  | <0.001               | <0.001             | <0.001            | <0.001            | <0.001            |



Table S3. The average price of key food items in Kibera and Mukuru

| Food groups                                  | Food items      | Units of price measurement | Mukuru                               |                       | Kibera                               |                       |
|----------------------------------------------|-----------------|----------------------------|--------------------------------------|-----------------------|--------------------------------------|-----------------------|
|                                              |                 |                            | Price per unit<br>(Kenyan Shillings) |                       | Price per unit<br>(Kenyan Shillings) |                       |
|                                              |                 |                            | Average<br>(\$KES)                   | Standard<br>Deviation | Average<br>(\$KES)                   | Standard<br>Deviation |
| Grains, white roots and tubers and plantains | Bread           | Loaf                       | 49                                   | 6                     | 50                                   | 0.0                   |
|                                              | Maize flour     | Per kilogram               | 118                                  | 10                    | 60                                   | 1.1                   |
|                                              | Rice            | Per kilogram               | 90                                   | 9                     | 98                                   | 6.6                   |
| Pulses (beans, peas and lentils)             | Nyayo beans     | Per kilogram               | 89                                   | 4                     | 98                                   | 8.9                   |
|                                              | Rose coco beans | Per kilogram               | 104                                  | 8                     | 108                                  | 11.2                  |
| Dairy                                        | Milk            | Per 500 milliliters        | 45                                   | 9                     | 50                                   | 3.7                   |
| Meat, poultry and fish                       | Beef            | Per kilogram               | 402                                  | 9                     | 395                                  | 36.9                  |
|                                              | Chicken         | Per piece                  | 230                                  |                       | 370                                  | 114.9                 |
|                                              | Nile perch      | Per piece                  | 75                                   | 35                    | 87                                   | 70.9                  |
|                                              | Omena           | Per cup                    | 25                                   | 7                     | 43                                   | 15.9                  |
|                                              | Tilapia         | Per piece                  | 43                                   | 10                    | 153                                  | 38.5                  |
| Eggs                                         | Egg             | Per egg                    | 10                                   | 0                     | 10                                   | 0.4                   |
| Dark green leafy vegetables                  | Kale            | Per bundle                 | 5                                    | 3                     | 5                                    | 1.1                   |
| Other vitamin A-rich fruits and vegetables   | Mango           | Per piece                  | 6                                    | 3                     | 13                                   | 7.5                   |
|                                              | Papaya          | Per piece                  | 180                                  |                       | 28                                   | 17.2                  |
|                                              | Sweet potatoes  | Per piece                  | 68                                   | 11                    | 68                                   | 10.6                  |
| Other vegetables                             | Cabbage         | Per piece                  | 76                                   | 43                    | 88                                   | 26.2                  |
|                                              | Onion           | Per piece                  | 5                                    | 0                     | 6                                    | 1.8                   |
|                                              | Tomato          | Per piece                  | 6                                    | 2                     | 8                                    | 2.6                   |

|                                 |                |                     |     |     |     |      |
|---------------------------------|----------------|---------------------|-----|-----|-----|------|
| Other fruits                    | Avocados       | Per piece           | 11  | 6   | 22  | 9.1  |
|                                 | Banana         | Per piece           | 5   | 0   | 8   | 2.5  |
|                                 | Coconut        | Per piece           | 40  |     | 40  |      |
|                                 | Orange         | Per piece           | 6   | 2   | 9   | 5.4  |
|                                 | Pineapple      | Per slice           | 18  | 3   | 18  | 2.9  |
|                                 | Watermelon     | Per piece           | 89  | 110 | 19  | 6.9  |
| Deep fried foods                | Bhajia         | Per plate           | 24  | 14  | 24  | 14.3 |
|                                 | French fries   | Per plate           | 19  | 4   | 38  | 13.1 |
|                                 | Mandazi        | Per piece           | 5   | 0   | 5   | 1.1  |
| Beverages                       | Soda           | Per 500 milliliters | 50  | 0   | 50  | 0.0  |
|                                 | Tea            | Per cup             | 17  | 5   | 17  | 4.9  |
| Other prepared snacks and meals | Chapati        | Per piece           | 10  | 2   | 11  | 1.8  |
|                                 | Rice and beans | Per plate           | 38  | 15  | 53  | 25.7 |
|                                 | Smokies        | Per piece           | 25  | 0   | 25  | 0.0  |
|                                 | Ugali          | Per plate           | 33  | 6   | 33  | 5.8  |
|                                 | Githeri        | Per plate           | 18  | 9   | 18  | 14.6 |
| Other staples                   | Sugar          | Per kilogram        | 109 | 19  | 113 | 7.7  |
|                                 | Cooking oil    | Per Litre           | 143 | 19  | 123 | 5.8  |

Table S4. An overview of the sensory properties of fruits and vegetables in Kibera and Mukuru

|            |              | Overall desirability      |                           | Aroma                     |                           | Size                      |                           | Touch/firmness            |                           | Visual appeal             |                           |
|------------|--------------|---------------------------|---------------------------|---------------------------|---------------------------|---------------------------|---------------------------|---------------------------|---------------------------|---------------------------|---------------------------|
| Fruits     |              | Kibera<br>(mean $\pm$ SD) | Mukuru<br>(mean $\pm$ SD) |
|            | Banana       | 4.92 $\pm$ 0.96           | 5.21 $\pm$ 0.85           | 5.38 $\pm$ 1.00           | 5.38 $\pm$ 1.00           | 5.17 $\pm$ 1.06           | 5.17 $\pm$ 1.06           | 4.98 $\pm$ 1.10           | 4.98 $\pm$ 1.10           | 4.83 $\pm$ 1.04           | 4.83 $\pm$ 1.04           |
|            | Mango        | 4.41 $\pm$ 0.87           | 4.44 $\pm$ 0.85           | 5.20 $\pm$ 0.63           | 5.20 $\pm$ 0.63           | 4.75 $\pm$ 0.81           | 4.75 $\pm$ 0.81           | 4.86 $\pm$ 0.77           | 4.86 $\pm$ 0.77           | 4.45 $\pm$ 0.90           | 4.45 $\pm$ 0.90           |
|            | Orange       | 5.27 $\pm$ 0.64           | 4.83 $\pm$ 0.75           | 5.60 $\pm$ 0.54           | 5.60 $\pm$ 0.54           | 5.13 $\pm$ 0.76           | 5.13 $\pm$ 0.76           | 5.58 $\pm$ 0.65           | 5.58 $\pm$ 0.65           | 5.42 $\pm$ 0.61           | 5.42 $\pm$ 0.61           |
|            | Pineapple    | 5.50 $\pm$ 0.52           | 4.90 $\pm$ 0.72           | 4.92 $\pm$ 1.16           | 4.92 $\pm$ 1.16           | 5.33 $\pm$ 0.65           | 5.33 $\pm$ 0.65           | 5.17 $\pm$ 0.94           | 5.17 $\pm$ 0.94           | 5.08 $\pm$ 0.67           | 5.08 $\pm$ 0.67           |
| Vegetables | Cabbage      | 5.04 $\pm$ 1.15           | 5.02 $\pm$ 0.96           | 5.08 $\pm$ 1.11           | 5.08 $\pm$ 1.11           | 4.88 $\pm$ 1.14           | 4.88 $\pm$ 1.14           | 5.17 $\pm$ 1.15           | 5.17 $\pm$ 1.15           | 5.02 $\pm$ 1.16           | 5.02 $\pm$ 1.16           |
|            | Kale         | 5.08 $\pm$ 0.92           | 4.98 $\pm$ 1.12           | 5.17 $\pm$ 1.06           | 5.17 $\pm$ 1.06           | 5.00 $\pm$ 1.19           | 5.00 $\pm$ 1.19           | 5.04 $\pm$ 1.18           | 5.04 $\pm$ 1.18           | 5.25 $\pm$ 1.14           | 5.25 $\pm$ 1.14           |
|            | Onion        | 5.13 $\pm$ 0.85           | 5.13 $\pm$ 0.85           | 5.21 $\pm$ 0.94           | 5.21 $\pm$ 0.94           | 4.73 $\pm$ 1.07           | 4.73 $\pm$ 1.07           | 5.25 $\pm$ 0.84           | 5.25 $\pm$ 0.84           | 5.29 $\pm$ 0.82           | 5.29 $\pm$ 0.82           |
|            | Sweet potato | 4.96 $\pm$ 1.08           | 4.96 $\pm$ 1.08           | 5.33 $\pm$ 0.82           | 5.33 $\pm$ 0.82           | 5.29 $\pm$ 1.00           | 5.29 $\pm$ 1.00           | 5.13 $\pm$ 1.03           | 5.13 $\pm$ 1.03           | 4.92 $\pm$ 1.25           | 4.92 $\pm$ 1.25           |
|            | Tomato       | 5.42 $\pm$ 0.87           | 4.58 $\pm$ 1.13           | 5.40 $\pm$ 0.84           | 5.40 $\pm$ 0.84           | 5.23 $\pm$ 0.90           | 5.23 $\pm$ 0.9            | 5.44 $\pm$ 1.03           | 5.44 $\pm$ 1.03           | 5.33 $\pm$ 1.00           | 5.33 $\pm$ 1.00           |

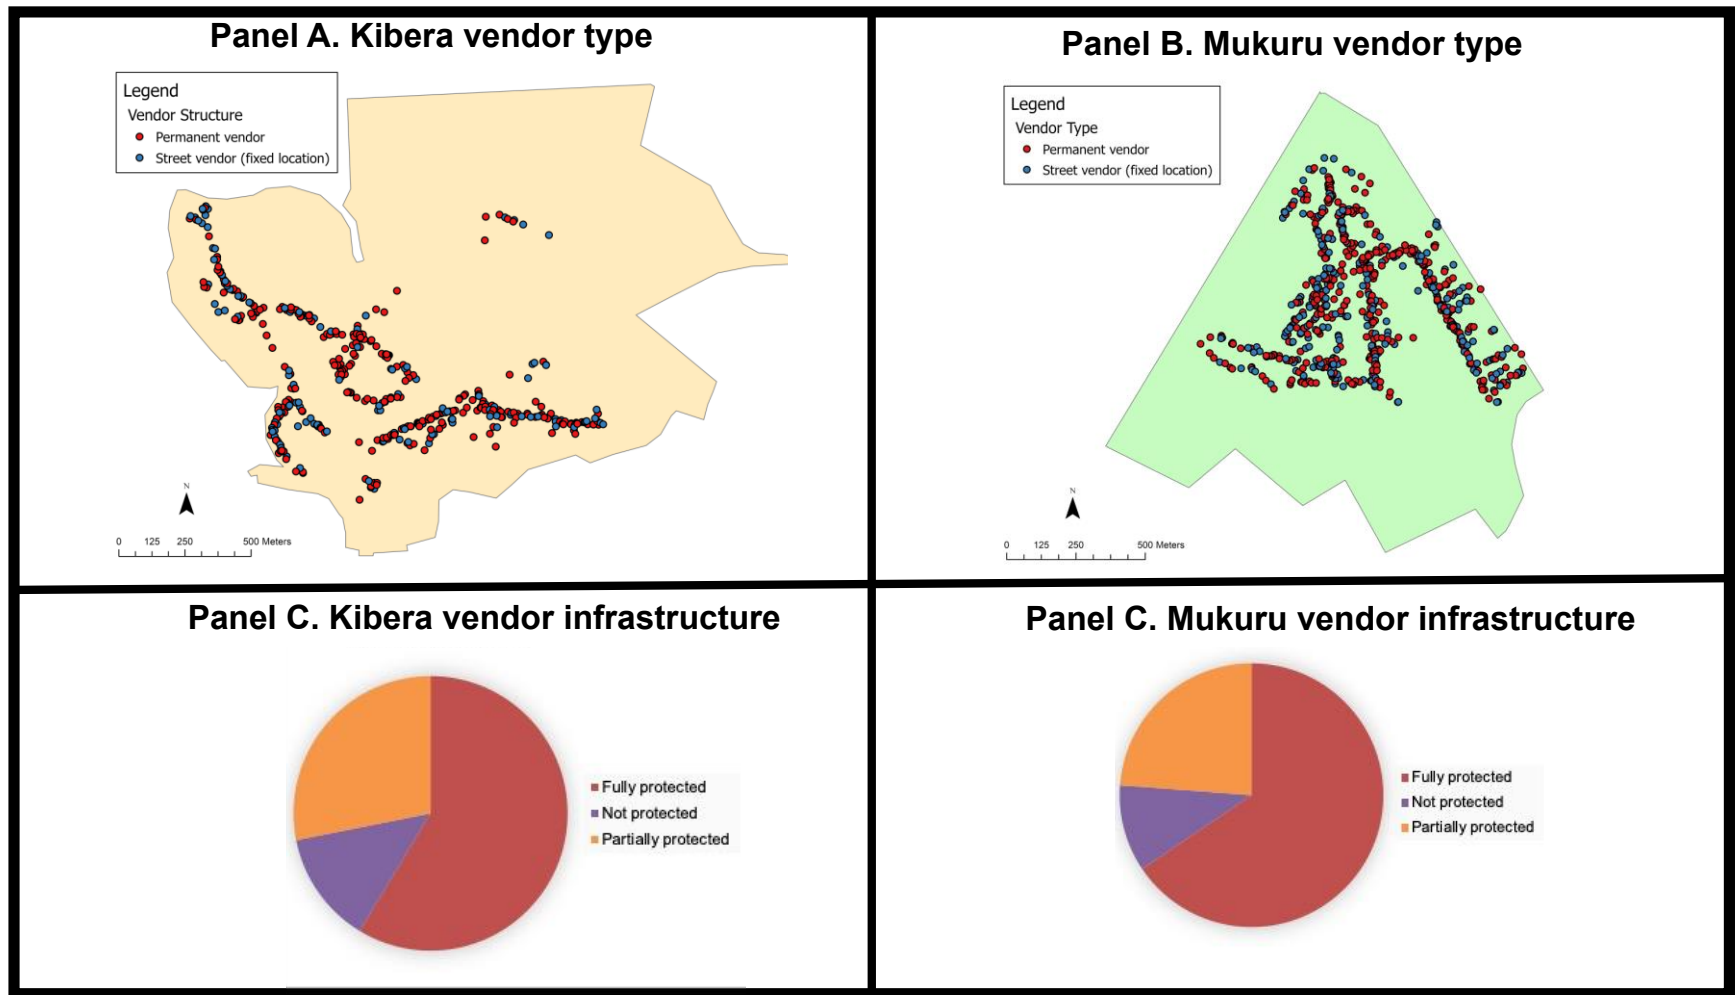

Figure S1. An overview of the types of vendors in Kibera (panel A) and Mukuru (panel B).

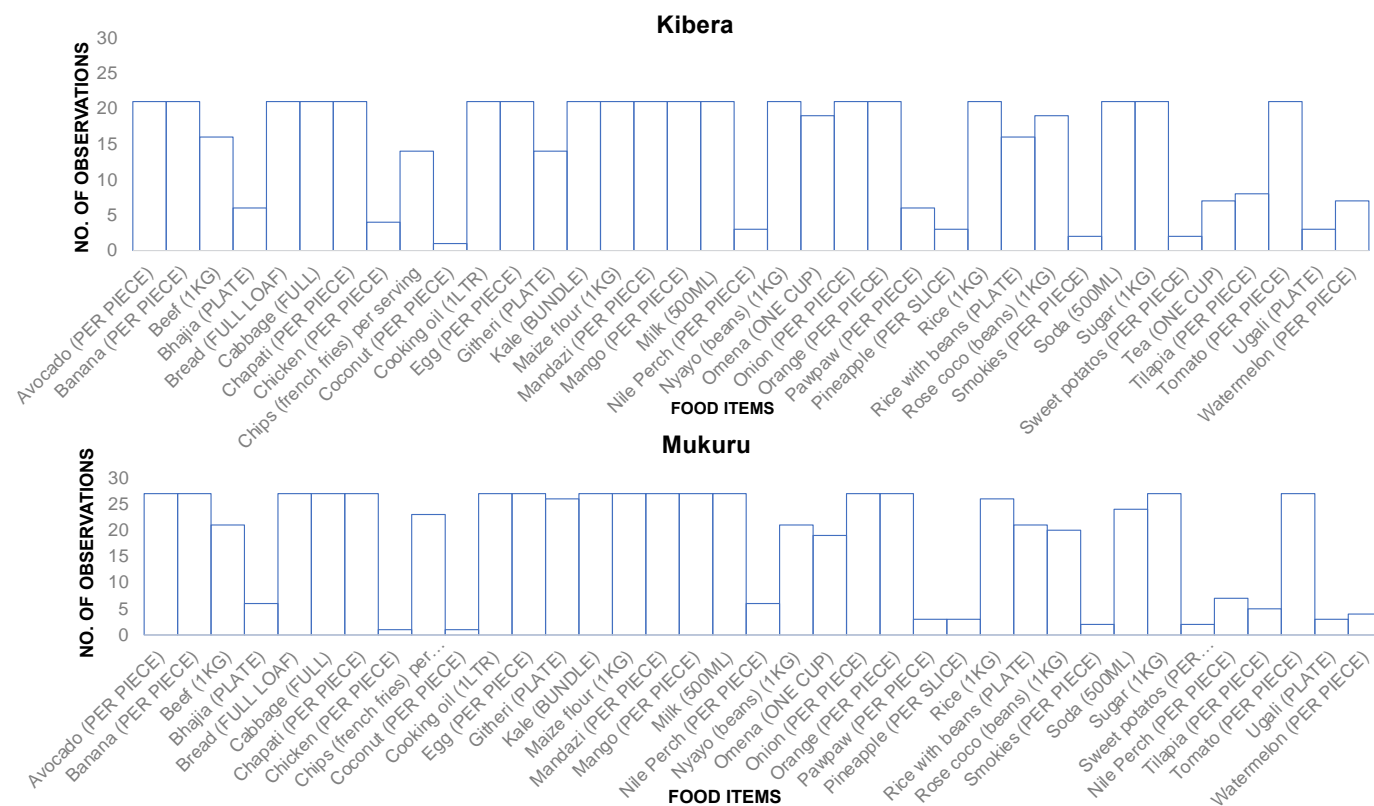

Figure S2. An overview of the summary of price observations for each food in both Kibera and Mukuru.
